# Supplementary material
Source: publisher figshare collection journal article supplement (https://tandf.figshare.com/ndownloader/files/13176323)
Supplement: Supplementary file 1 [file 13176323]

**List of Terms**

acute myelogenous leukemia (AML): cancer of the blood and bone marrow

allogeneic: denoting, relating to, or involving tissues or cells that are genetically dissimilar, although from individuals of the same species

attenuated vaccine: a vaccine based on a virus or bacterium that has been crippled by mutation that allows it to be introduced into humans without the same toxicity as the unmodified pathogen

Campath (generic: alemtuzumab): drug used in the treatment of chronic lymphocytic leukemia (CLL), cutaneous T-cell lymphoma (CTCL), and T-cell lymphoma

D+: CMV+ donor

D-: CMV- donor

DNAemia: the detection of DNA in samples of plasma, whole blood, and isolated peripheral blood leukocytes or in buffy-coat specimens

haploidentical: refers to a tranplant donor which is at least a 50% match to recipient; half-identical

interstitial pneumonitis: lung disease (usually caused by a virus) affecting the interstitium, often present with autoimmune conditions

iTag MHC tetramers: a product that is a multimer of extracellular domains of major histocompatability complex molecules that are fluorescently tagged (via an avidin:biotin interaction) to peptides and complexed, which enables detection of cell surface T cell receptors and can quantitate their concentration

MF59: an oil and water adjuvant, developed by Chiron (a subsidiary acquired by Novartis) that has European Union approval for vaccine use and is part of a composition of an EMA-approved flu vaccine

pre-emptive therapy: the process by which patients are treated with antivirals based upon a threshold of viral load that is measured by quantitative PCR on a weekly basis for most stem cell and solid organ transplant recipients

R+: CMV+ recipient

R-: CMV-recipient

sensorineural: the property of human or mammalian neurologic function involved in sensory perception mediated by nerves (taste, smell, touch, or hearing). CMV infection affects hearing with irrevocable damage caused by congenital virus infection.

viral load: a measurement of the amount of a virus in an organism

viremia: the presence of viruses in the blood
